# Supplementary material for: Exploring the Transmission Path, Influencing Factors and Risk of Aerosol Transmission of SARS-CoV-2 at Xi’an Xianyang International Airport
Source: MDPI journal article supplement (doi:10.3390/ijerph20010865), 2023-01-03
Supplement: s1 [file s1]

# Supporting Materials

Table S1. The changes of particle concentration over time at PM<sub>2.5</sub>, PM<sub>10</sub>, 0.3μm, 0.5μm, 1μm, 2.5μm, 5μm, 10μm in different sites .

|        | Time/min | PM <sub>2.5</sub> /mg/m <sup>3</sup> | PM <sub>10</sub> /mg/m <sup>3</sup> | Particle Concentration/particle/L |       |       |       |     |      |
|--------|----------|--------------------------------------|-------------------------------------|-----------------------------------|-------|-------|-------|-----|------|
|        |          |                                      |                                     | 0.3μm                             | 0.5μm | 1μm   | 2.5μm | 5μm | 10μm |
| Site A | 0        | 0.081                                | 0.143                               | 130840                            | 45980 | 12360 | 1260  | 100 | 0    |
|        | 20       | 0.111                                | 0.193                               | 132550                            | 43840 | 10160 | 970   | 30  | 0    |
|        | 40       | 0.074                                | 0.125                               | 119840                            | 41280 | 10510 | 680   | 40  | 0    |
|        | 60       | 0.074                                | 0.151                               | 138500                            | 45720 | 11060 | 730   | 30  | 0    |
|        | 80       | 0.067                                | 0.11                                | 119970                            | 39700 | 9690  | 760   | 100 | 0    |
|        | 100      | 0.064                                | 0.113                               | 117630                            | 39490 | 9370  | 740   | 30  | 0    |
|        | 120      | 0.057                                | 0.096                               | 114880                            | 37590 | 9560  | 680   | 40  | 0    |
|        | 140      | 0.054                                | 0.094                               | 111420                            | 36130 | 8530  | 560   | 60  | 0    |
|        | 160      | 0.054                                | 0.094                               | 112530                            | 37500 | 9440  | 860   | 30  | 0    |
|        | 180      | 0.054                                | 0.094                               | 108320                            | 35800 | 8950  | 730   | 30  | 0    |
|        | 200      | 0.059                                | 0.099                               | 123370                            | 39660 | 9630  | 850   | 30  | 0    |
| Site B | 0        | 0.208                                | 0.216                               | 107000                            | 43950 | 17250 | 2650  | 320 | 60   |
|        | 20       | 0.211                                | 0.245                               | 100100                            | 41400 | 16440 | 1890  | 240 | 60   |
|        | 40       | 0.237                                | 0.245                               | 100500                            | 41740 | 16650 | 1890  | 240 | 60   |
|        | 60       | 0.231                                | 0.241                               | 101460                            | 41560 | 16270 | 1510  | 240 | 60   |
|        | 80       | 0.229                                | 0.238                               | 95050                             | 39100 | 15400 | 1680  | 250 | 60   |
|        | 100      | 0.226                                | 0.23                                | 87900                             | 36480 | 14560 | 1740  | 180 | 40   |
|        | 120      | 0.221                                | 0.229                               | 83890                             | 34770 | 13870 | 1420  | 160 | 40   |
|        | 140      | 0.224                                | 0.193                               | 89120                             | 36300 | 14080 | 1500  | 180 | 40   |
|        | 160      | 0.192                                | 0.198                               | 86850                             | 36730 | 15080 | 1640  | 210 | 70   |
|        | 180      | 0.198                                | 0.202                               | 90550                             | 36610 | 14040 | 1600  | 200 | 70   |
|        | 200      | 0.201                                | 0.205                               | 101420                            | 40570 | 15270 | 1860  | 240 | 30   |
|        | 220      | 0.211                                | 0.215                               | 104140                            | 42560 | 16590 | 1700  | 280 | 40   |
| Site C | 0        | 0.234                                | 0.241                               | 96130                             | 44560 | 17730 | 3260  | 410 | 230  |
|        | 20       | 0.225                                | 0.233                               | 103450                            | 43720 | 17650 | 2630  | 620 | 150  |
|        | 40       | 0.214                                | 0.216                               | 125060                            | 50420 | 19210 | 2500  | 370 | 60   |
|        | 60       | 0.203                                | 0.21                                | 125710                            | 52270 | 20400 | 2900  | 550 | 80   |
|        | 80       | 0.195                                | 0.205                               | 104920                            | 48620 | 18730 | 2950  | 610 | 100  |
|        | 100      | 0.182                                | 0.195                               | 120830                            | 49580 | 20210 | 2720  | 550 | 100  |
|        | 120      | 0.174                                | 0.181                               | 95530                             | 40920 | 15660 | 2480  | 480 | 80   |
|        | 140      | 0.172                                | 0.18                                | 127020                            | 50800 | 18420 | 2400  | 350 | 100  |
|        | 160      | 0.17                                 | 0.18                                | 118350                            | 50220 | 19300 | 3010  | 560 | 110  |
|        | 180      | 0.168                                | 0.184                               | 108300                            | 46210 | 16810 | 2730  | 570 | 80   |
|        | 200      | 0.181                                | 0.183                               | 116100                            | 42860 | 16500 | 2670  | 380 | 100  |
|        | 220      | 0.202                                | 0.214                               | 107730                            | 46200 | 18260 | 2530  | 350 | 100  |
| Site D | 0        | 0.108                                | 0.11                                | 159330                            | 64910 | 25150 | 3620  | 810 | 150  |
|        | 20       | 0.096                                | 0.103                               | 141450                            | 55000 | 19700 | 2960  | 550 | 120  |
|        | 40       | 0.077                                | 0.087                               | 125150                            | 49680 | 18460 | 2800  | 600 | 150  |
|        | 60       | 0.073                                | 0.079                               | 109310                            | 43910 | 16650 | 2670  | 550 | 130  |
|        | 80       | 0.074                                | 0.083                               | 117360                            | 47080 | 17810 | 3100  | 710 | 130  |
|        | 100      | 0.072                                | 0.082                               | 116420                            | 47200 | 18160 | 2850  | 610 | 120  |
|        | 120      | 0.086                                | 0.081                               | 113720                            | 44870 | 16510 | 2630  | 400 | 80   |

|        |     |       |       |        |       |       |      |      |     |
|--------|-----|-------|-------|--------|-------|-------|------|------|-----|
|        | 140 | 0.069 | 0.083 | 109700 | 43700 | 16330 | 2370 | 420  | 100 |
|        | 160 | 0.068 | 0.08  | 110100 | 43550 | 16080 | 2280 | 380  | 100 |
|        | 180 | 0.061 | 0.081 | 118960 | 47250 | 17670 | 2620 | 400  | 100 |
|        | 200 | 0.08  | 0.095 | 136820 | 53810 | 19670 | 3020 | 620  | 100 |
|        | 220 | 0.081 | 0.096 | 135350 | 55810 | 22030 | 3380 | 1050 | 280 |
|        | 240 | 0.084 | 0.098 | 129810 | 57030 | 24900 | 3500 | 720  | 150 |
| Site E | 0   | 0.246 | 0.26  | 175600 | 73860 | 30020 | 5220 | 470  | 120 |
|        | 20  | 0.209 | 0.219 | 130870 | 54570 | 21920 | 3060 | 330  | 100 |
|        | 40  | 0.185 | 0.199 | 124380 | 53920 | 22900 | 2820 | 420  | 110 |
|        | 60  | 0.187 | 0.198 | 131560 | 55410 | 22580 | 3160 | 430  | 100 |
|        | 80  | 0.193 | 0.204 | 140470 | 57410 | 22360 | 3230 | 420  | 120 |
|        | 100 | 0.186 | 0.195 | 120160 | 51950 | 21970 | 2680 | 370  | 100 |
|        | 120 | 0.187 | 0.197 | 123280 | 51970 | 21220 | 3130 | 400  | 130 |
|        | 140 | 0.183 | 0.191 | 108570 | 46110 | 19630 | 2580 | 380  | 80  |
|        | 160 | 0.184 | 0.196 | 117420 | 48350 | 19160 | 2200 | 300  | 50  |
|        | 180 | 0.192 | 0.204 | 130460 | 56550 | 24000 | 3150 | 460  | 80  |
|        | 200 | 0.22  | 0.231 | 140960 | 59630 | 24460 | 3320 | 480  | 110 |
|        | 220 | 0.222 | 0.235 | 160170 | 67750 | 27770 | 3400 | 480  | 100 |
| Site F | 0   | 0.258 | 0.258 | 150010 | 65000 | 30021 | 4210 | 870  | 220 |
|        | 20  | 0.214 | 0.228 | 123670 | 54720 | 23860 | 3120 | 460  | 130 |
|        | 40  | 0.191 | 0.208 | 117300 | 51280 | 22030 | 2940 | 400  | 100 |
|        | 60  | 0.19  | 0.194 | 113180 | 49990 | 21750 | 3090 | 430  | 130 |
|        | 80  | 0.191 | 0.197 | 113860 | 49540 | 21140 | 2800 | 490  | 130 |
|        | 100 | 0.187 | 0.183 | 107920 | 47770 | 20850 | 3280 | 540  | 120 |
|        | 120 | 0.181 | 0.183 | 106570 | 50780 | 24200 | 2670 | 430  | 120 |
|        | 140 | 0.177 | 0.184 | 105080 | 47120 | 20910 | 2970 | 490  | 120 |
|        | 160 | 0.178 | 0.185 | 104430 | 45870 | 19830 | 2760 | 420  | 130 |
|        | 180 | 0.183 | 0.191 | 109860 | 47650 | 20250 | 2760 | 400  | 120 |
|        | 200 | 0.208 | 0.215 | 121360 | 53740 | 23470 | 3370 | 490  | 80  |
|        | 220 | 0.21  | 0.216 | 126060 | 55270 | 23820 | 3010 | 430  | 100 |
